# Supplementary material
Source: publisher figshare collection journal article supplement (https://frontiersin.figshare.com/ndownloader/files/25613816)
Supplement: Supplementary file 1 [file 25613816]

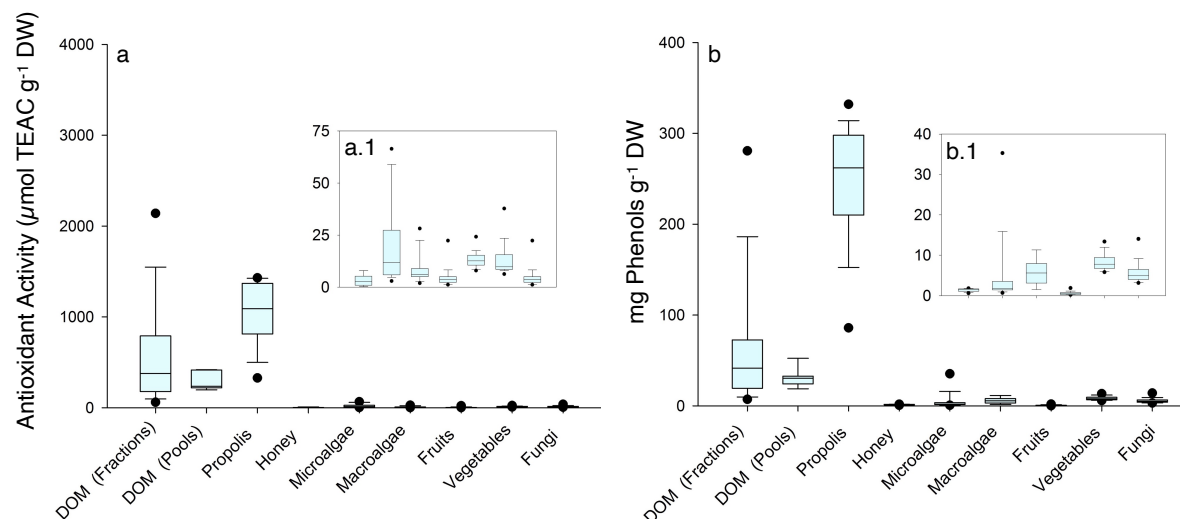

**Figure S4.** (a) Antioxidant activity ( $\mu\text{mol TEAC g}^{-1} \text{ DW}$ ) and (b) phenolic content (mg phenols  $\text{g}^{-1} \text{ DW}$ ) of marine dissolved organic matter in comparison with various micro- and macro-algae species and food groups. Sub-panels a.1 and b.1. zoom in the honey, micro-, macro-algae, fruits, vegetables and fungi groups. Black dots indicate 5<sup>th</sup> and 95<sup>th</sup> percentile values. All results are normalized by dry weight (DW) of DOM.
